# Supplementary material
Source: publisher figshare collection journal article supplement (https://tandf.figshare.com/ndownloader/files/17226827)
Supplement: Supplementary file 1 [file 17226827]

## Appendix 1. Harvard Faculty of Medicine IRB approval

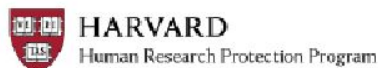

Harvard Faculty of Medicine  
Office of Human Research Administration  
90 Smith Street, 3rd Floor  
Boston, MA 02120  
Federalwide Assurance FWA00007071

### Notification of Initial Study Exemption Determination

June 26, 2017

Felipe Piza  
felipe.piza@einstein.br

**Protocol Title:** Assessing metacognition awareness of learning strategies among medical students and medical faculty  
**Principal Investigator:** Felipe Piza  
**Protocol #:** IRB17-1005  
**Funding Source:** None  
**IRB Review Date:** 6/26/2017  
**IRB Effective Date:** 6/26/2017  
**IRB Review Action:** Exempt

This Initial Study submission meets the criteria for exemption per the regulations found at 45 CFR 46.101(b)(2). As such, additional IRB review is not required. For international research, the Principal Investigator is required to comply with any applicable local laws, legislation, regulations, and/or policies. Additionally, if local IRB/ethics review is required, it must be obtained before any human subjects research activities are conducted in the field. If assistance with applicable local requirements is needed, please contact the Harvard Faculty of Medicine IRB office.

The determination that your research is exempt does not expire, and you will not file annual renewals. If changes to the research are proposed that would alter the IRB's original exemption determination, they should be submitted in ESTR by using the Modify Study button. If unsure, contact the Harvard Faculty of Medicine IRB office.

The IRB made the following determinations:

- Research Information Security Level: The research is classified, using Harvard's Data Security Policy, as Level 2 Data.

Please contact me at 617.432.5132 or [kninsala@hsph.harvard.edu](mailto:kninsala@hsph.harvard.edu) with any questions.

Sincerely,

A handwritten signature in black ink, appearing to read 'Keren-Nicole Insalaco'.

Keren-Nicole Insalaco  
Sr. IRB Review Specialist

---

University Area IRB <http://cuhs.harvard.edu>  
Longwood Medical Area IRB <http://www.hsph.harvard.edu/ohra/>

1  
2  
3 **Appendix 2. Harvard Medical School Academy approval**  
4  
5  
6  
7

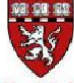

8  
9  
10  
11 **Harvard Medical School Academy**  
12 260 Longwood Avenue • TMEC 384 • Boston, MA 02115  
13

14  
15  
16 Dear Dr. Piza, MD,

17  
18 Your study, *“Assessing study strategies awareness among medical students and faculty”* has  
19 been approved by the HMS Academy.

20 We are sending a copy of the approval notice and to the HMS IRB. They will assist you with next  
21 steps in the HMS IRB review process.  
22

23 Thank you and please let us know if you have questions.

24 The Academy

25  
26 **The Academy | Harvard Medical School**  
27 260 Longwood Ave | TMEC 384 | Boston MA 02115  
28 T: 617-432-5401 | F: 617-432-7850 | E: [Academy@hms.harvard.edu](mailto:Academy@hms.harvard.edu)  
29 [The Academy at Harvard Medical School](#)

30 Cc: Kimberley Serpico, HMS IRB  
31  
32  
33  
34  
35  
36  
37  
38  
39  
40  
41  
42  
43  
44  
45  
46  
47  
48  
49  
50  
51  
52  
53  
54  
55  
56  
57  
58  
59  
60

View Only

**Appendix 3.** Student's survey questionnaire

1  
2  
3  
4  
5  
6  
7  
8  
9  
10  
11  
12  
13  
14  
15  
16  
17  
18  
19  
20  
21  
22  
23  
24  
25  
26  
27  
28  
29  
30  
31  
32  
33  
34  
35  
36  
37  
38  
39  
40  
41  
42  
43  
44  
45  
46  
47  
48  
49  
50  
51  
52  
53  
54  
55  
56  
57  
58  
59  
60

1. Would you say that you study the way you do because a teacher (teachers) taught you to study that way?

Yes

No

2. How do you decide what to study next?

Whatever's due soonest/overdue

Whatever I haven't studied for the longest time

Whatever I find interesting

Whatever I feel I'm doing the worst in

I plan my study schedule ahead of time and I study whatever I've scheduled

3. Do you usually return to course material to review it after a course has ended?

Yes

No

4. When you study do you typically read a text book/article/other source material more than once?

Yes, I reread whole chapters/articles

Yes, I reread sections that I underlined/highlighted/marked

Not usually

5. If you quiz yourself while you study (either using a quiz at the end of a chapter or a practice quiz or flashcards or something else) why do you do so?

I learn more that way than I would through rereading

To figure out how well I have learned the information I'm studying

I find quizzing more enjoyable than reading

I usually do not quiz myself

1  
2  
3 6. Imagine that in the course of studying you become convinced that you know the answer to a  
4 certain question (e.g., the definition of a medical term). What would you do?  
5

- 6  Make sure to study (or test yourself on) it again later  
7  
8  Put it aside and focus on other material  
9

10  
11  
12 7. Which of the following best describes your pattern of study?  
13

- 14  I most often space out my study sessions over multiple days/weeks  
15  
16  I most often do my studying in one session before the test  
17

18  
19 8. Which of the following study strategies do you **use** regularly? (Please check off all that apply.)  
20

- 21  test yourself with questions or practice problems  
22  
23  use flashcards  
24  
25  recopy your notes  
26  
27  reread chapters, articles, notes, etc.  
28  
29  make outlines while reading  
30  
31  underline or highlight while reading  
32  
33  make diagrams, charts, or pictures  
34  
35  study with friends  
36  
37  "cram" lots of information the night before the test  
38  
39  ask questions or verbally participate during class  
40  
41  other (Please describe) \_\_\_\_\_  
42  
43  
44

45 9. Do you believe you have a specific learning style (e.g., are you visual or verbal learner)?  
46

- 47  Yes  
48  
49  No  
50  
51  No, I learn best through multiple methods  
52

53  
54 10. The next section will present pairs of course or study scenarios. You will be asked to rate  
55 each scenario. Two assignments ask students to learn the list of cranial nerves using a  
56 mnemonic device. **Assignment A** includes a commonly used mnemonic device provided by  
57  
58  
59

1  
2  
3 the instructor to assist students in their learning. **Assignment B** asks students to create their  
4 own mnemonic device to assist their learning. After two weeks, all students are asked to list the  
5 cranial nerves in order. Please give your rating for **assignment A** for learning cranial nerves  
6

- 7  Very ineffective  
8  
9  Ineffective  
10  
11  Somewhat ineffective  
12  
13  Neither effective nor ineffective  
14  
15  Somewhat effective  
16  
17  Effective  
18  
19  Very effective  
20  
21

22 11. Please give your rating for **assignment B** for learning cranial nerves  
23

- 24  Very ineffective  
25  
26  Ineffective  
27  
28  Somewhat ineffective  
29  
30  Neither effective nor ineffective  
31  
32  Somewhat effective  
33  
34  Effective  
35  
36  Very effective  
37

38 12. In two different classes, a 275-word prose passage about pathophysiology is presented. In  
39 **Class A**, students first study the passage for seven minutes, and then are asked to write down  
40 from memory as much of the material from the passage as they can. In **Class B**, students first  
41 study the passage for seven minutes, and then are asked to study the passage again for another  
42 seven minutes. After one week, all students are asked to recall as much of the passage as they  
43 can remember. Please give your rating for **class A** for recalling the passage after 1 week.  
44  
45

- 46  Very ineffective  
47  
48  Ineffective  
49  
50  Somewhat ineffective  
51  
52  Neither effective nor ineffective  
53  
54  Somewhat effective  
55  
56  
57  
58  
59  
60

- 1  
2  
3  
4  Effective  
5  
6  Very effective  
7  
8

9  
10 13. Please give your rating for **class B** for recalling the passage after 1 week.

- 11  Very ineffective  
12  
13  Ineffective  
14  
15  Somewhat ineffective  
16  
17  Neither effective nor ineffective  
18  
19  Somewhat effective  
20  
21  Effective  
22  
23  Very effective  
24  
25  
26  
27  
28  
29  
30  
31  
32  
33  
34  
35  
36  
37  
38  
39  
40  
41  
42  
43  
44  
45  
46  
47  
48  
49  
50  
51  
52  
53  
54  
55  
56  
57  
58  
59  
60

1  
2  
3 14. Two professors present 6 slides showing each of 12 tissue types (72 slides total).

4 **Professor A** presents all six slides of a single tissue (i.e., grouped), and then moves on to the  
5 next set of tissues' six slides, and so on, until all slides have been presented.

6 **Professor B** presents the various tissues' slides in an intermingled fashion (i.e., mixed), such that  
7 a single slide of a particular tissue would be followed by a different tissue. Please give your  
8 rating for **professor A's** teaching technique  
9

- 10  
11  Very ineffective  
12  
13  Ineffective  
14  
15  Somewhat ineffective  
16  
17  Neither effective nor ineffective  
18  
19  Somewhat effective  
20  
21  Effective  
22  
23  Very effective  
24

25 15. Please give your rating for **professor B's** teaching technique  
26

- 27  Very ineffective  
28  
29  Ineffective  
30  
31  Somewhat ineffective  
32  
33  Neither effective nor ineffective  
34  
35  Somewhat effective  
36  
37  Effective  
38  
39  Very effective  
40  
41  
42  
43  
44  
45  
46  
47  
48  
49  
50  
51  
52  
53  
54  
55  
56  
57  
58  
59  
60

1  
2  
3  
4 16. Two students are studying for an exam. **Student A** studies the two days leading up to the  
5 exam. **Student B** starts studying two weeks before the exam, studying a little bit everyday.  
6 Both students study the same number of hours. Please give your rating for **Student A's** study  
7 strategy  
8

- 9  
10  Very ineffective  
11  
12  Ineffective  
13  
14  Somewhat ineffective  
15  
16  Neither effective nor ineffective  
17  
18  Somewhat effective  
19  
20  Effective  
21  
22  Very effective  
23

24  
25 17. Please give your rating for **Student B's** study strategy  
26

- 27  Very ineffective  
28  
29  Ineffective  
30  
31  Somewhat ineffective  
32  
33  Neither effective nor ineffective  
34  
35  Somewhat effective  
36  
37  Effective  
38  
39  Very effective  
40  
41  
42  
43  
44  
45  
46  
47  
48  
49  
50  
51  
52  
53  
54  
55  
56  
57  
58  
59  
60



18. Which of the study strategies do you think is **most effective** for longer term retention? Please click to drag and drop for **ranking** from 1-11. 1 as the most effective and 11 as the least effective.

- \_\_\_\_\_ test yourself with questions or practice problems  
 \_\_\_\_\_ use flashcards  
 \_\_\_\_\_ recopy your notes  
 \_\_\_\_\_ reread chapters, articles, notes, etc.  
 \_\_\_\_\_ make outlines while reading  
 \_\_\_\_\_ underline or highlight while reading  
 \_\_\_\_\_ make diagrams, charts, or pictures  
 \_\_\_\_\_ study with friends  
 \_\_\_\_\_ “cram” lots of information the night before the test  
 \_\_\_\_\_ ask questions or verbally participate during class  
 \_\_\_\_\_ other (Please describe)

19. What is your current USMLE Step 1 score? - note this is anonymous and survey software does not retain any information about you as an individual

- USMLE\_score \_\_\_\_\_  
 I haven't taken Step 1  
 Prefer not to answer

*Display This Question:*

*If What is your current USMLE Step 1 score? = I haven't taken Step 1*

20. What is your MCAT score? - note this is anonymous and survey software does not retain any information about you as an individual

- Score \_\_\_\_\_  
 Prefer not to answer

21. What is your affirmed gender?

- Man  
 Woman  
 Other \_\_\_\_\_  
 Prefer not to answer

22. How old are you?

- Age in years \_\_\_\_\_

1  
2  
3  
4  
5  
6 23. What year of Medical School are you?

- 7  First year  
8  
9  Second year  
10  
11  Third year  
12  
13  Fourth year  
14  
15  Fifth year - schools outside the US  
16  
17  Sixth year -schools outside the US  
18  
19  
20

21 24. What specialty are you pursuing?

- 22  Internal Medicine  
23  
24  Pediatrics  
25  
26  OBGYN  
27  
28  General Surgery  
29  
30  Neurology  
31  
32  Psychiatry  
33  
34  Family Medicine  
35  
36  Other \_\_\_\_\_  
37  
38  
39  Not decided  
40  
41  
42  
43

44 25. What is the most common teaching method used in your School?

- 45  Lecture  
46  
47  PBL - Problem Based Learning  
48  
49  TBL - Team Based Learning  
50  
51  CBCL - Case-Based Collaborative Learning  
52  
53  Other \_\_\_\_\_  
54  
55  
56  
57  
58  
59  
60

1  
2  
3 **Appendix 4.** Faculty survey questionnaire  
4

5 1. Do you discuss study techniques in class?  
6

7  Yes  
8

9  No  
10

11 *Display This Question:*

12 *If Do you discuss study techniques in class? = Yes*  
13  
14

15 2. How often do you discuss study techniques?  
16

17  A few times a week  
18

19  About once a week  
20

21  Before tests/major assignments  
22

23  About once every semester  
24

25  Other \_\_\_\_\_  
26

27  
28 3. How do you think your students **choose** to study?  
29

30  Whatever's due soonest/overdue  
31

32  Whatever they haven't studied for the longest time  
33

34  Whatever they find interesting  
35

36  Whatever they feel they're doing the worst in  
37

38  They plan their study schedule ahead of time and they study whatever they have scheduled  
39

40 4. How do you think your students **should** choose to study?  
41

42  Whatever's due soonest/overdue  
43

44  Whatever they haven't studied for the longest time  
45

46  Whatever they find interesting  
47

48  Whatever they feel they're doing the worst in  
49

50  They plan their study schedule ahead of time and they study whatever they have scheduled  
51

52 5. Do you return to earlier material in later sections? (e.g., reviewing week 1 material near the  
53 middle of the semester)  
54

55  Yes  
56  
57  
58  
59  
60

1  
2  
3  
4  No  
5

6 6. Do you recommend study techniques to students, either in class or during out of class  
7 meetings?  
8

9  Yes

10  
11  No  
12  
13  
14

15 7. If yes, which of the following study techniques do **you recommend** students use regularly?  
16 (please check off all that apply)  
17

18  test yourself with questions or practice problems

19  use flashcards

20  recopy your notes

21  reread chapters, articles, notes, etc.

22  make outlines while reading

23  underline or highlight while reading

24  make diagrams, charts, or pictures

25  study with friends

26  "cram" lots of information the night before the test

27  ask questions or verbally participate during class

28  other (Please describe) \_\_\_\_\_  
29  
30  
31  
32  
33  
34  
35  
36  
37  
38  
39  
40

41 8. If you do discuss study techniques in class, do you think students use those techniques?  
42

43  Yes

44  Yes for my class, but not necessarily for others

45  No

46  Some do, some do not  
47  
48  
49  
50

51 9. If you think students should quiz themselves (either using a quiz at the end of a chapter, a  
52 practice quiz, flashcards or something else), why should they do so?  
53

54  They will learn more that way than through rereading  
55  
56  
57  
58  
59  
60

- 1  
2  
3  
4  To figure out how well they have learned the information they're studying  
5  
6  I do not think quizzing will necessarily benefit students  
7

8  
9 10. Do you use/encourage spacing techniques in class? (e.g., leaving days/weeks for students to  
10 study for the next exam or returning to information after discussing it)

- 11  Yes  
12  
13  No  
14

15  
16 11. Do you believe students have different learning styles (e.g., visual vs. auditory learners)?

- 17  Yes (1)  
18  
19  No (2)  
20  
21

22 *Display This Question:*

23 *If Do you believe students have different learning styles (e.g., visual vs. auditory learners)? =*  
24 *Yes*

25  
26 12. Do you teach to accommodate those differences?

- 27  Yes  
28  
29  No  
30  
31

32 13. The next section will present pairs of course or study scenarios. You will be asked to rate  
33 each scenario. Two assignments ask students to learn the list of cranial nerves using a  
34 mnemonic device. **Assignment A** includes a commonly used mnemonic device provided by  
35 the instructor to assist students in their learning. **Assignment B** asks students to create their  
36 own mnemonic device to assist their learning. After two weeks, all students are asked to list the  
37 cranial nerves in order. Please give your rating for **assignment A** for learning cranial nerves

- 38  
39  Very ineffective  
40  
41  Ineffective  
42  
43  Somewhat ineffective  
44  
45  Neither effective nor ineffective  
46  
47  Somewhat effective  
48  
49  Effective  
50  
51  Very effective  
52  
53  
54

55 14. Please give your rating for **assignment B** for learning cranial nerves  
56  
57  
58  
59  
60

1  
2  
3  
4  
5  
6  
7  
8  
9  
10  
11  
12  
13  
14  
15  
16  
17  
18  
19  
20  
21  
22  
23  
24  
25  
26  
27  
28  
29  
30  
31  
32  
33  
34  
35  
36  
37  
38  
39  
40  
41  
42  
43  
44  
45  
46  
47  
48  
49  
50  
51  
52  
53  
54  
55  
56  
57  
58  
59  
60

- Very ineffective
- Ineffective
- Somewhat ineffective
- Neither effective nor ineffective
- Somewhat effective
- Effective
- Very effective

For Peer-Review Only

1  
2  
3  
4  
5  
6  
7  
8  
9  
10  
11  
12  
13  
14  
15  
16  
17  
18  
19  
20  
21  
22  
23  
24  
25  
26  
27  
28  
29  
30  
31  
32  
33  
34  
35  
36  
37  
38  
39  
40  
41  
42  
43  
44  
45  
46  
47  
48  
49  
50  
51  
52  
53  
54  
55  
56  
57  
58  
59  
60

15. In two different classes, a 275-word prose passage about pathophysiology is presented. In **Class A**, students first study the passage for seven minutes, and then are asked to write down from memory as much of the material from the passage as they can. In **Class B**, students first study the passage for seven minutes, and then are asked to study the passage again for another seven minutes. After one week, all students are asked to recall as much of the passage as they can remember. Please give your rating for **class A** for recalling the passage after 1 week.

- Very ineffective
- Ineffective
- Somewhat ineffective
- Neither effective nor ineffective
- Somewhat effective
- Effective
- Very effective

16. Please give your rating for **class B** for recalling the passage after 1 week.

- Very ineffective
- Ineffective
- Somewhat ineffective
- Neither effective nor ineffective
- Somewhat effective
- Effective
- Very effective

1  
2  
3  
4 17. Two professors present 6 slides showing each of 12 tissue types (72 slides total).

5 **Professor A** presents all six slides of a single tissue (i.e., grouped), and then moves on to the  
6 next set of tissues' six slides, and so on, until all slides have been presented.

7 **Professor B** presents the various tissues' slides in an intermingled fashion (i.e., mixed), such that  
8 a single slide of a particular tissue would be followed by a different tissue. Please give your  
9 rating for **professor A's** teaching technique  
10  
11

- 12  Very ineffective  
13  
14  Ineffective  
15  
16  Somewhat ineffective  
17  
18  Neither effective nor ineffective  
19  
20  Somewhat effective  
21  
22  Effective  
23  
24  Very effective  
25  
26  
27

28 18. Please give your rating for **professor B's** teaching technique

- 29  Very ineffective  
30  
31  Ineffective  
32  
33  Somewhat ineffective  
34  
35  Neither effective nor ineffective  
36  
37  Somewhat effective  
38  
39  Effective  
40  
41  Very effective  
42  
43  
44  
45  
46  
47  
48  
49  
50  
51  
52  
53  
54  
55  
56  
57  
58  
59  
60



1  
2  
3 19. Two students are studying for an exam. **Student A** studies the two days leading up to the  
4 exam. **Student B** starts studying two weeks before the exam, studying a little bit everyday. Both  
5 students study the same number of hours. Please give your rating for **Student A's** study strategy  
6

- 7  Very ineffective  
8  
9  Ineffective  
10  
11  Somewhat ineffective  
12  
13  Neither effective nor ineffective  
14  
15  Somewhat effective  
16  
17  Effective  
18  
19  Very effective  
20  
21  
22

23 20. Please give your rating for **Student B's** study strategy  
24

- 25  Very ineffective  
26  
27  Ineffective  
28  
29  Somewhat ineffective  
30  
31  Neither effective nor ineffective  
32  
33  Somewhat effective  
34  
35  Effective  
36  
37  Very effective  
38  
39  
40  
41  
42  
43  
44  
45  
46  
47  
48  
49  
50  
51  
52  
53  
54  
55  
56  
57  
58  
59  
60

1  
2  
3  
4  
5  
6  
7  
8  
9  
10  
11  
12  
13  
14  
15  
16  
17  
18  
19  
20  
21  
22  
23  
24  
25  
26  
27  
28  
29  
30  
31  
32  
33  
34  
35  
36  
37  
38  
39  
40  
41  
42  
43  
44  
45  
46  
47  
48  
49  
50  
51  
52  
53  
54  
55  
56  
57  
58  
59  
60

21. Which of the study strategies do you think is **most effective** for learning? Please click to move and **rank** from 1-11. 1 as the most effective and 11 as the least effective.

- \_\_\_\_\_ test yourself with questions or practice problems
- \_\_\_\_\_ use flashcards
- \_\_\_\_\_ recopy your notes
- \_\_\_\_\_ reread chapters, articles, notes, etc.
- \_\_\_\_\_ make outlines while reading
- \_\_\_\_\_ underline or highlight while reading
- \_\_\_\_\_ make diagrams, charts, or pictures
- \_\_\_\_\_ study with friends
- \_\_\_\_\_ “cram” lots of information the night before the test
- \_\_\_\_\_ ask questions or verbally participate during class
- \_\_\_\_\_ other (Please describe)

22. How many years have you been teaching?

- Number of years \_\_\_\_\_

23. What subject/area do you teach? If more than one, choose the subject/area you teach in the most

- Pre clinical medical students
- Clinical medical students
- Residency

24. On average how many students do you teach on a regular basis in a classroom or clinical setting each year?

- Number of students \_\_\_\_\_

25. What is your academic rank?

- Professor
- Associate Professor
- Assistant Professor
- Adjunct Professor
- Graduate Teaching Assistant
- Academic Adviser

1  
2  
3  
4  Instructor

5  
6  Other \_\_\_\_\_

7  
8  
9  
10 26. Please sum to 100% how do you distribute your working time

11 patient care : \_\_\_\_\_

12 administrative : \_\_\_\_\_

13 clinical research : \_\_\_\_\_

14 laboratorial research : \_\_\_\_\_

15 teaching : \_\_\_\_\_

16 other : \_\_\_\_\_

17 Total : \_\_\_\_\_

18  
19  
20 27. What is the **most** common teaching method used in your School?

21  Lecture

22  PBL - Problem Based Learning

23  TBL - Team Based Learning

24  CBCL - Case-Based Collaborative Learning

25  Other \_\_\_\_\_

26  
27  
28  
29  
30  
31  
32  
33 28. What is your affirmed gender?

34  Man

35  Woman

36  Other \_\_\_\_\_

37  Prefer not to answer
